# Supplementary material for: A magnetically recyclable superparamagnetic silica supported Pt nanocatalyst through a multi-carboxyl linker: synthesis, characterization, and applications in alkene hydrosilylation
Source: Royal Society of Chemistry journal article supplement (doi:10.1039/c9ra00375d), 2019-01-01
Supplement: c9ra00375d1.pdf [file c9ra00375d1.pdf]

Support information

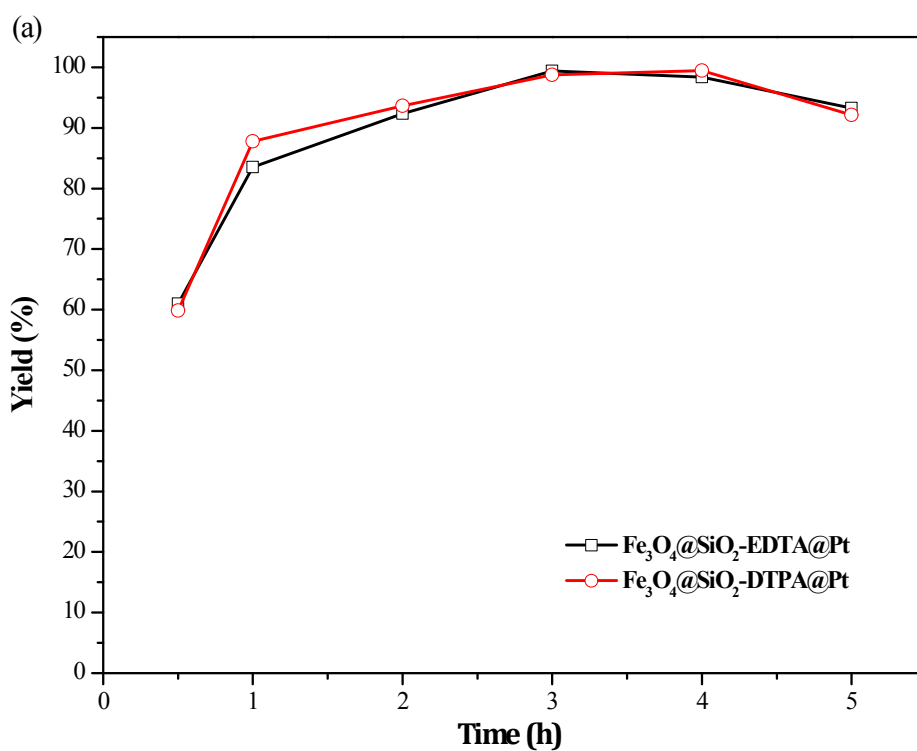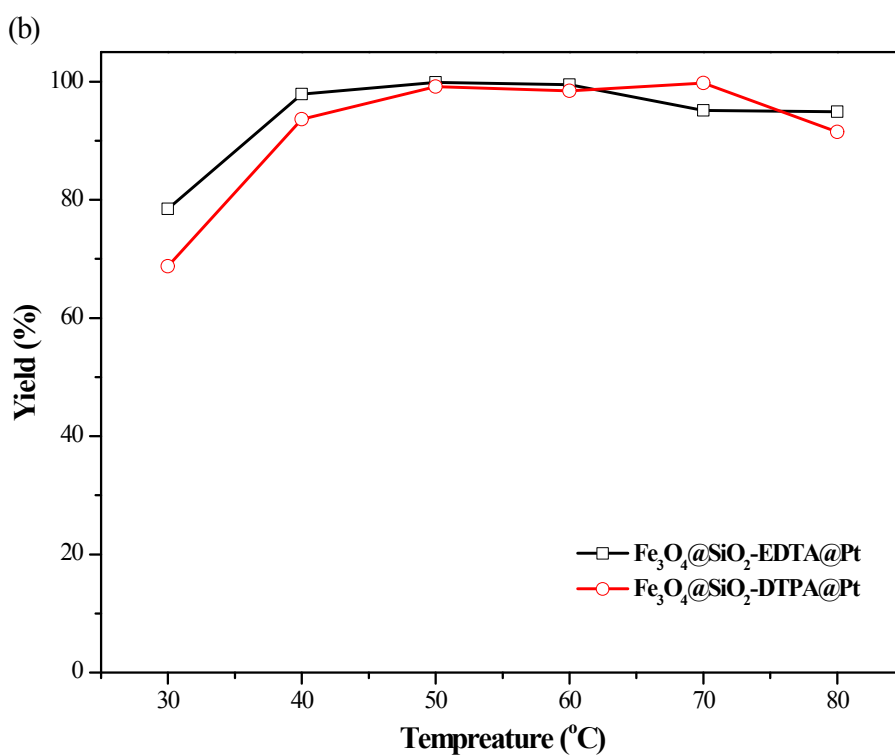

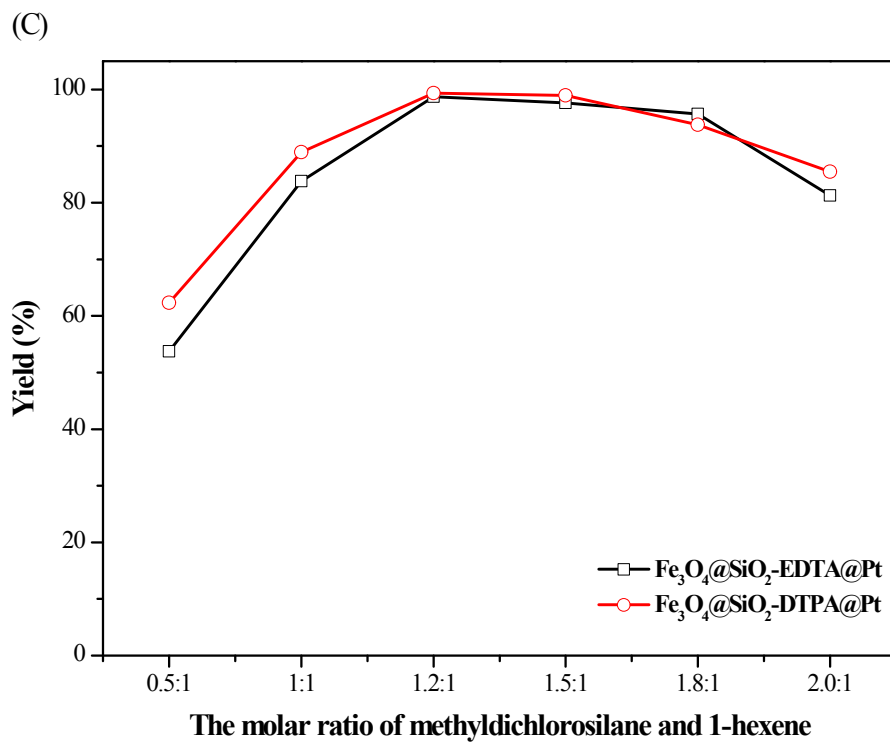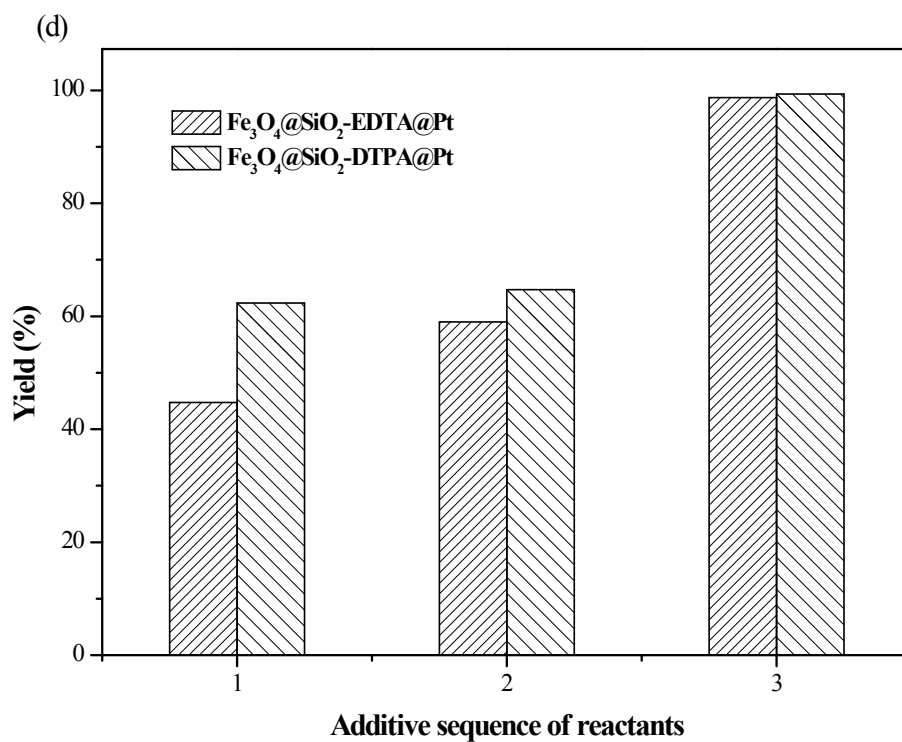

**Figure S1** (a) Effect of the reaction time on the hydrosilylation of 1-hexene using  $2.01 \times 10^{-3}$  mmol Pt catalyst (11.6 mg  $\text{Fe}_3\text{O}_4@SiO_2\text{-EDTA@Pt}$ , 10.8 mg  $\text{Fe}_3\text{O}_4@SiO_2\text{-$

DTPA@Pt). Reaction conditions: 11.8 mmol 1-hexene, 19.2 mmol methyldichlorosilane, 60 °C, 4 h. (b) Effect of reaction temperature on the hydrosilylation of 1-hexene. Reaction conditions: 11.8 mmol 1-hexene, 19.2 mmol methyldichlorosilane, 4 h. (c) The effect of the molar ratio of methyldichlorosilane and 1-hexene using  $2.01 \times 10^{-3}$  mmol Pt catalyst. Reaction conditions: 4 h, 60°C. (d) Effect of additive sequence of reactants on the yield of 1-hexyl-methyldichlorosilane, Reaction conditions: 11.8 mmol 1-hexene, 19.2 mmol methyldichlorosilane, 4 h, 60°C.

- 1-hexene added to methyldichlorosilane after methyldichlorosilane mixing with the catalyst for 30 min.
- Simultaneous addition.
- Methyldichlorosilane added to 1-hexene after mixing with the catalyst for 30 min.

(a)

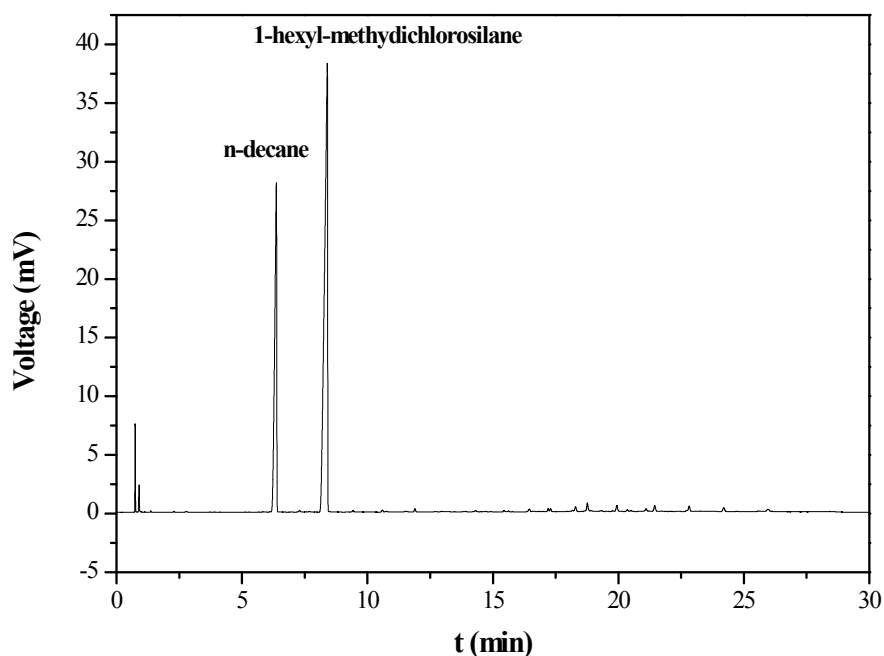

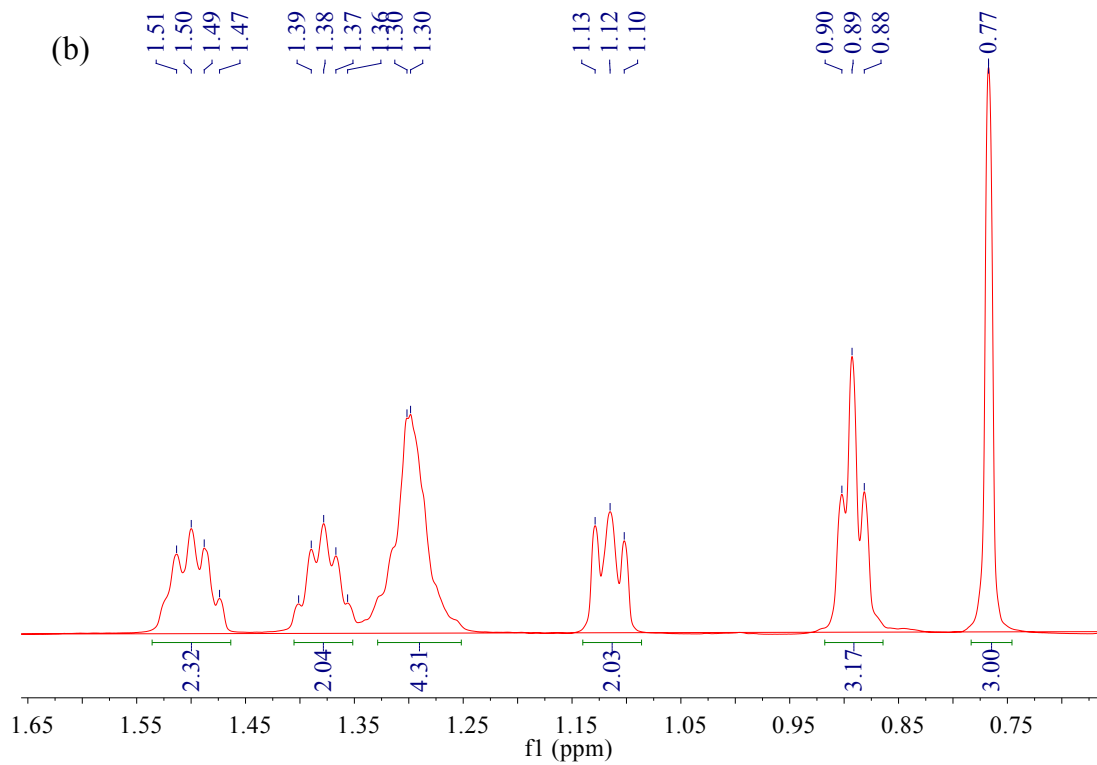

**Figure S2** (a) GC chromatograms and (b) NMR spectrum of 1-hexylmethyldichlorosilane

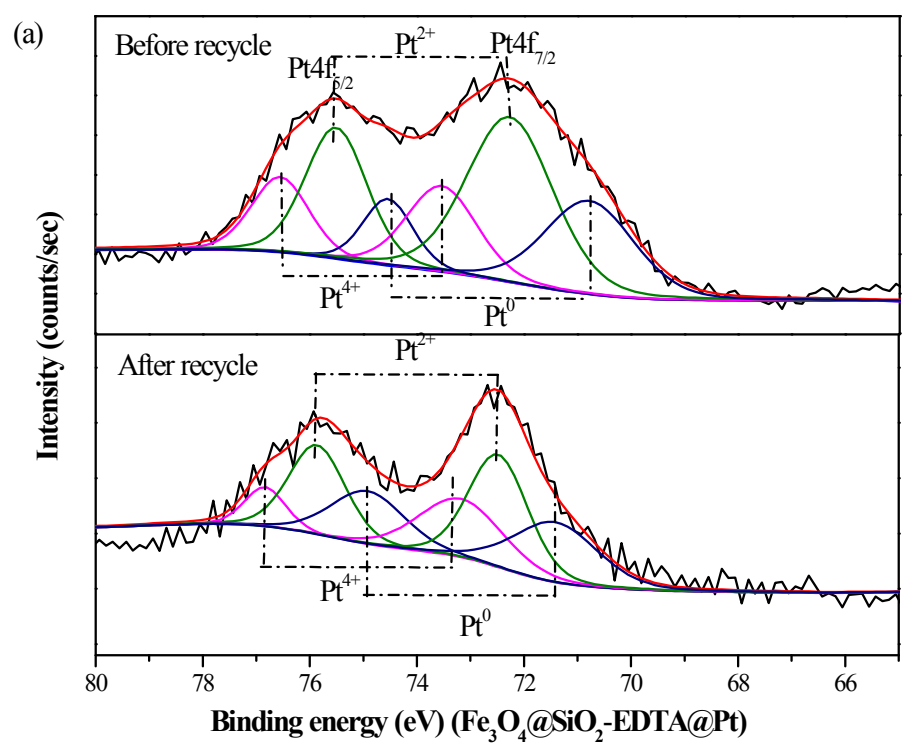

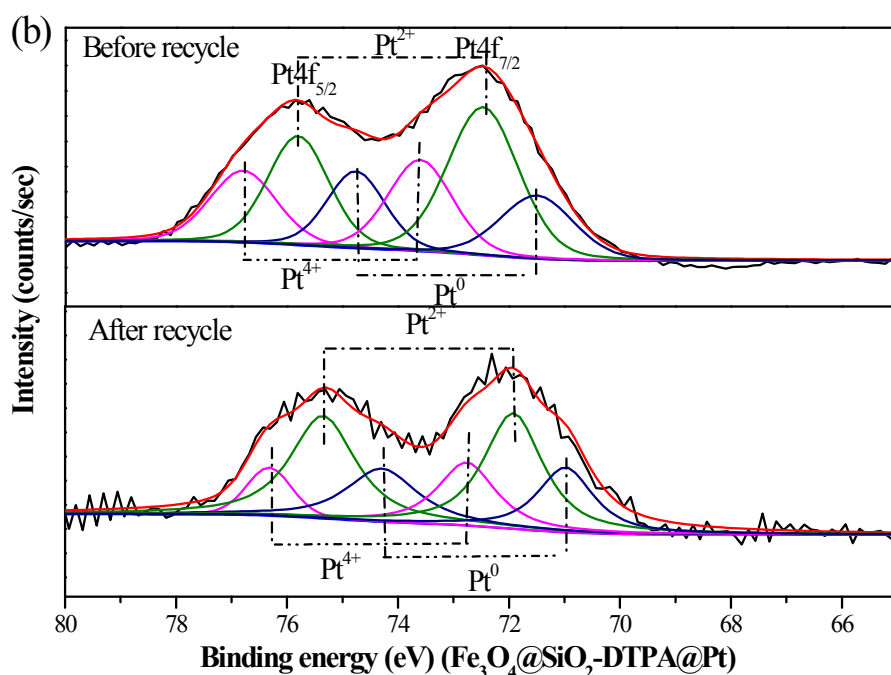

**Figure S3** the state change of Pt catalysts in high-resolution XPS before and after recycle experiments. (a)  $\text{Fe}_3\text{O}_4@\text{SiO}_2\text{-EDTA}@\text{Pt}$ ; (b)  $\text{Fe}_3\text{O}_4@\text{SiO}_2\text{-DTPA}@\text{Pt}$ .

**Table S1** The residual and loss of the recycled Pt catalysts

| Cycle | $\text{Fe}_3\text{O}_4@\text{SiO}_2\text{-EDTA} @\text{Pt}$ |                       | $\text{Fe}_3\text{O}_4@\text{SiO}_2\text{-DTPA}@\text{Pt}$ |                       |
|-------|-------------------------------------------------------------|-----------------------|------------------------------------------------------------|-----------------------|
|       | Pt amount<br>( $\mu\text{mol/g}$ )                          | The loss of Pt<br>(%) | Pt amount<br>( $\mu\text{mol/g}$ )                         | The loss of Pt<br>(%) |
| 0     | 173.80                                                      | -                     | 192.77                                                     | -                     |
| 2     | 173.80                                                      | 0.0                   | 191.74                                                     | 0.5                   |
| 4     | 168.16                                                      | 3.2                   | 191.23                                                     | 0.8                   |
| 6     | 168.67                                                      | 3.0                   | 185.08                                                     | 4.0                   |
| 8     | 162.50                                                      | 6.5                   | 184.05                                                     | 4.5                   |
| 10    | 160.47                                                      | 7.7                   | 180.46                                                     | 6.4                   |
| 12    | 155.78                                                      | 10.4                  | 177.62                                                     | 7.9                   |

**Table S2** the state change of Pt catalysts in high-resolution XPS before and after recycle experiments.

| State of Pt          | Fe <sub>3</sub> O <sub>4</sub> @SiO <sub>2</sub> -EDTA@Pt |               | Fe <sub>3</sub> O <sub>4</sub> @SiO <sub>2</sub> -DTPA@Pt |               |
|----------------------|-----------------------------------------------------------|---------------|-----------------------------------------------------------|---------------|
|                      | Before recycle                                            | After recycle | Before recycle                                            | After recycle |
| Pt <sup>4+</sup> (%) | 28.9                                                      | 23.9          | 26.4                                                      | 20.4          |
| Pt <sup>2+</sup> (%) | 46.5                                                      | 43.1          | 50.3                                                      | 51.4          |
| Pt <sup>0</sup> (%)  | 24.6                                                      | 33.0          | 23.3                                                      | 28.2          |
